# Supplementary material
Source: Springer Nature journal article supplement (https://www.springermedizin.de/resource/supplementary/12955_2007_372_MOESM3_ESM.pdf/9560266)

Item: crying [CES17] - 3 Levels for Person Factor: AGEGP

Slope

0.39

Expected Value

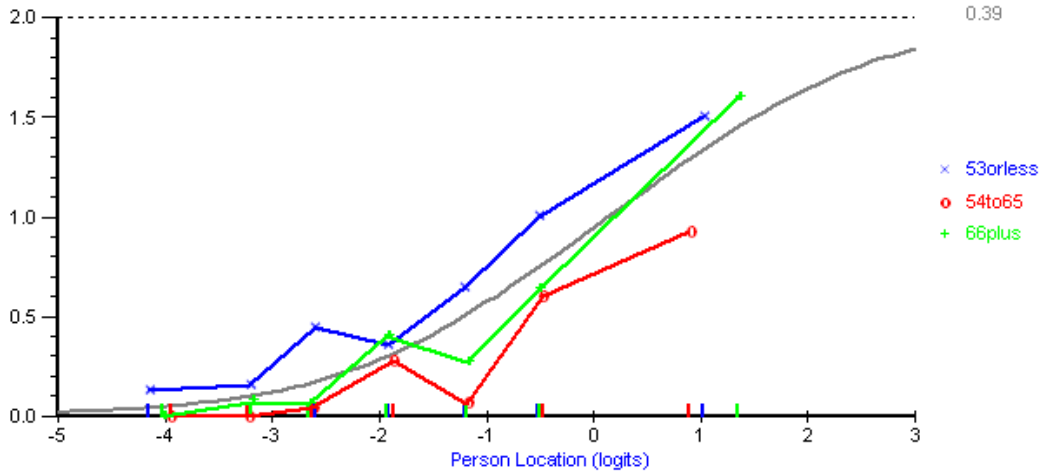

Supplement: MOESM3 [file 9560266]
